# Supplementary material for: The Effects of a 12-Month Weight Loss Intervention on Cognitive Outcomes in Adults with Overweight and Obesity
Source: PubMed Central journal article supplement (PMC7600527; doi:10.3390/nu12102988), 2020-09-29
Supplement: nutrients-12-02988-s001.pdf [file nutrients-12-02988-s001.pdf]

**Supplemental Table 1. Iowa Gambling Task.** Pre- and post-intervention group scores are presented as mean (SD).

|                                 | <b>DIET</b>   |               | <b>DIET + MODEX</b> |               | <b>DIET + HIGHEX</b> |               |
|---------------------------------|---------------|---------------|---------------------|---------------|----------------------|---------------|
|                                 | <i>PRE</i>    | <i>POST</i>   | <i>PRE</i>          | <i>POST</i>   | <i>PRE</i>           | <i>POST</i>   |
| <b>Total Payoff</b>             | 20.52 (29.50) | 26.91 (28.75) | 19.97 (26.84)       | 29.79 (25.56) | 23.87 (27.17)        | 33.49 (29.94) |
| <b>Reward Sensitivity Score</b> | 30.12 (29.94) | 21.00 (32.54) | 42.10 (24.57)       | 35.07 (24.63) | 25.56 (30.25)        | 39.39 (24.61) |

Note: There were no between-group differences (all  $p$ -values  $> 0.05$ ) on any pre-intervention value.

**Supplemental Table 2. Task Switching.** Pre- and post-intervention group scores are presented as mean (SD).

|                       | <b>DIET</b>      |                 | <b>DIET + MODEX</b> |                 | <b>DIET + HIGHEX</b> |                 |
|-----------------------|------------------|-----------------|---------------------|-----------------|----------------------|-----------------|
|                       | <i>PRE</i>       | <i>POST</i>     | <i>PRE</i>          | <i>POST</i>     | <i>PRE</i>           | <i>POST</i>     |
| <b>Repeat RT</b>      | 862.83 (118.66)  | 838.78 (119.23) | 865.80 (136.51)     | 846.71 (89.18)  | 880.23 (89.87)       | 863.48 (95.08)  |
| <b>Switching RT</b>   | 955.23 (147.62)  | 925.85 (110.72) | 972.06 (152.94)     | 935.64 (102.32) | 979.34 (113.39)      | 914.50 (158.75) |
| <b>Mixing Cost</b>    | -141.13 (102.97) | -139.29 (90.84) | -172.01 (121.11)    | -167.24 (86.42) | -185.73 (95.73)      | -146.25 (91.35) |
| <b>Switching Cost</b> | 92.41 (73.20)    | 87.07 (67.76)   | 106.26 (72.85)      | 88.93 (72.17)   | 99.11 (79.82)        | 72.91 (72.37)   |

Note: There were no between-group differences (all  $p$ -values > 0.05) on any pre-intervention value.

**Supplemental Table 3. Stroop Task.** Pre- and post-intervention group scores are presented as mean (SD). Stroop effect is calculated as (incongruent–congruent)/congruent.

|                       | <b>DIET</b>     |                 | <b>DIET + MODEX</b> |                 | <b>DIET + HIGHEX</b> |                 |
|-----------------------|-----------------|-----------------|---------------------|-----------------|----------------------|-----------------|
|                       | <i>PRE</i>      | <i>POST</i>     | <i>PRE</i>          | <i>POST</i>     | <i>PRE</i>           | <i>POST</i>     |
| <b>Congruent RT</b>   | 768.46 (81.33)  | 754.12 (91.63)  | 746.30 (84.45)      | 752.99 (95.75)  | 769.29 (67.76)       | 791.86 (104.01) |
| <b>Incongruent RT</b> | 891.26 (126.78) | 882.85 (142.54) | 897.01 (122.86)     | 907.79 (164.76) | 909.55 (104.51)      | 922.30 (127.47) |
| <b>Neutral RT</b>     | 795.90 (88.55)  | 791.81 (104.60) | 779.01 (90.51)      | 786.64 (101.67) | 802.92 (68.93)       | 826.28 (104.21) |
| <b>Stroop Effect</b>  | 0.16 (0.09)     | 0.17 (0.09)     | 0.20 (0.08)         | 0.20 (0.11)     | 0.18 (0.08)          | 0.17 (0.08)     |

Note: There were no between-group differences (all  $p$ -values > 0.05) on any pre-intervention value.

**Supplemental Table 4. N-Back Task.** Pre- and post-intervention group scores are presented as mean (SD).

|                           | <b>DIET</b>      |                 | <b>DIET + MODEX</b> |                  | <b>DIET + HIGHEX</b> |                 |
|---------------------------|------------------|-----------------|---------------------|------------------|----------------------|-----------------|
|                           | <i>PRE</i>       | <i>POST</i>     | <i>PRE</i>          | <i>POST</i>      | <i>PRE</i>           | <i>POST</i>     |
| <b>1-Back RT</b>          | 872.10 (152.57)  | 821.34 (201.01) | 884.50 (174.68)     | 875.33 (167.58)  | 872.00 (154.87)      | 821.62 (194.65) |
| <b>2-Back RT</b>          | 1018.08 (163.14) | 996.14 (169.34) | 1078.08 (186.05)    | 1057.37 (192.71) | 1040.08 (166.82)     | 980.45 (195.22) |
| <b>2-back – 1-back RT</b> | 145.98 (125.41)  | 174.80 (156.78) | 193.58 (146.53)     | 182.04 (115.24)  | 168.07 (117.54)      | 158.83 (235.94) |

Note: There were no between-group differences (all *p*-values > 0.05) on any pre-intervention value.
